# Supplementary material
Source: PubMed Central journal article supplement (PMC7800747)
Supplement: Leo_Supp_App.pdf [file Leo_Supp_App.pdf]

**Supplemental materials for:**

Leo P, Gastala NM, Fleurimont J, Messmer S, et al. A community partnership to improve access to buprenorphine in a homeless population. *Ann Fam Med*. 2021;19(1):85.

Paul Leo, MD<sup>1</sup>

Nicole Gastala, MD<sup>1,2</sup>

Judes Fleurimont<sup>2</sup>

Sarah Messmer, MD<sup>1</sup>

Philip Maes, RN, MS, CARN<sup>2</sup>

Jessica Richardson, MD<sup>1</sup>

Christine Neeb, MD<sup>1</sup>

Nathan Stackhouse, MD, MPH<sup>1,2</sup>

Stephan Koruba, FNP-BC<sup>3</sup>

Dennis P. Watson, PhD<sup>4</sup>

<sup>1</sup>University of Illinois College of Medicine, Chicago, Illinois

<sup>2</sup>Mile Square Health Centers, Chicago, Illinois

<sup>3</sup>The Night Ministry, Chicago, Illinois

<sup>4</sup>Lighthouse Institute, Chestnut Health Systems, Chicago, Illinois

Figure 1. The night ministry and mile square health center telemedicine workflow.

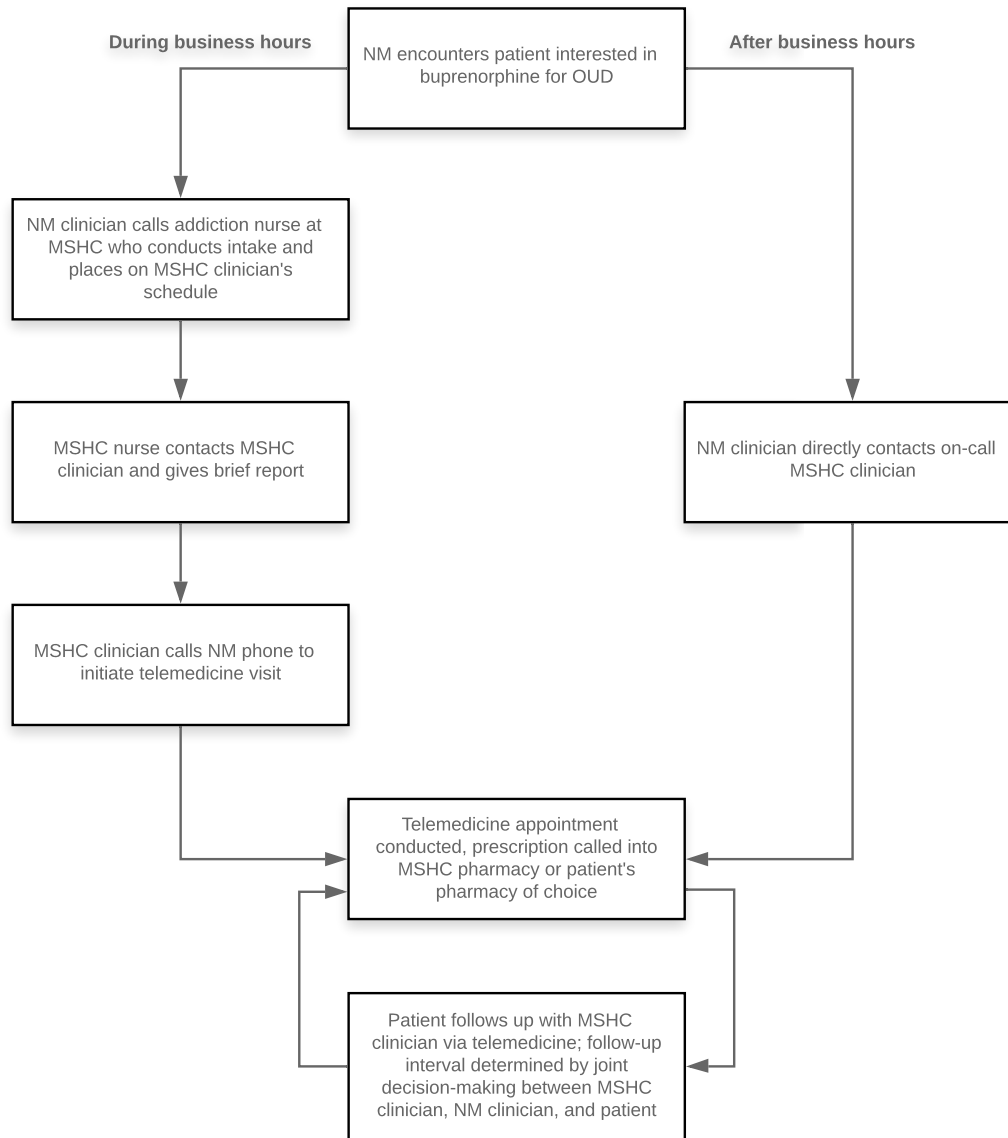

**Funding support:** Funding for the feasibility trial from which telemedicine protocols were adapted was provided by Arnold Ventures.

**Acknowledgments:** We would like to thank the outreach workers, case managers, and substance use advocates from The Night Ministry, and the staff of Mile Square Health Centers for their contribution to this work. Arnold Ventures provided funding for a pre-existing study from which our mobile health protocols were adapted.

## REFERENCES

1. Parshley L. The pandemic may fuel the next wave of the opioid crisis. National Geographic. Published Apr 21, 2020. Accessed Jun 1, 2020. <https://www.nationalgeographic.com/science/2020/04/coronavirus-pandemic-may-fuel-the-next-wave-of-the-opioid-crisis/>

2. Prevoznik TW. DEA policy: use of telephone evaluations to initiate buprenorphine prescribing. US Dept of Justice, Drug Enforcement Administration, Diversion Control Division. Published Mar 2020. [https://www.deadiversion.usdoj.gov/GDP/\(DEA-DC-022\)\(DEA068\)%20DEA%20SAMHSA%20buprenorphine%20telemedicine%20%20\(Final\)%20+Esign.pdf](https://www.deadiversion.usdoj.gov/GDP/(DEA-DC-022)(DEA068)%20DEA%20SAMHSA%20buprenorphine%20telemedicine%20%20(Final)%20+Esign.pdf) Accessed June 1, 2020.
